# Supplementary material for: Tunable 3D hierarchical Ni3S2superstructures as efficient and stable bifunctional electrocatalysts for both H2and O2generation
Source: Royal Society of Chemistry journal article supplement (doi:10.1039/c7ta10790k), 2018-01-01
Supplement: c7ta10790k1.pdf [file c7ta10790k1.pdf]

*Supporting Information for*

**Tunable 3D hierarchical Ni<sub>3</sub>S<sub>2</sub> superstructures as efficient  
and ultrastable bifunctional electrocatalysts for both H<sub>2</sub>  
and O<sub>2</sub> generations**

Lingyou Zeng, Kaian Sun, Zhichao Yang, Shengli Xie, Zhi Liu, Yanju Chen,  
Yaqing Liu, Jinchong Zhao, Yunqi Liu\* and Chenguang Liu\*

*State Key Laboratory of Heavy Oil Processing, Key Laboratory of Catalysis,  
China University of Petroleum (East China), Qingdao, 266580, P. R. China.*

*Corresponding author: liuyq-group@upc.edu.cn; cgliu@upc.edu.cn*

The supporting information includes two sections: I More experimental  
Details; II Additional Data and Figures.

# I. More experimental Details

## I.1 Chemical etching method

Chemical etching is generally used in the industrial metal removal to acquire components that cannot be machined easily throughout conventional machining techniques. Normally, a strong chemical bath with specified temperature is conducted to metal surfaces, where metal cations are released from the metal substrates into the solution to obtain specific shapes.<sup>1-3</sup> Taking the merit of this method, we speculate this synthesis of 3D nanostructures could be achievable in a hydro/solvo-thermal solution, due to the exfoliated metal ions may nucleate into crystalline grain.<sup>4</sup> Driven by the energy fluctuation, the as-formed grains may further grow into secondary architectures of target products.<sup>5-7</sup> Hence the chemical etching in a hydro/solvo-thermal process may ultimately bring about objective materials with peculiar structural morphologies, high surface active areas, and good adhesion to the metal substrates, thus giving the materials with particular functionality for widespread applications, such as electrocatalysis.

In this work, Nickel foam here acts dual roles of nickel ions sources and supporting frameworks, in which Ni atoms are dissolved into cations derivatives when attacked via chemical etching, further reacting with thiourea (Tu), the sulfide ions source, to grow 3D Ni<sub>3</sub>S<sub>2</sub> superstructures.

## I.2 IR correction

To fairly compare the performance of various catalysts, all the polarization curves were corrected for ohmic losses throughout the system, which include the wiring, substrate, catalyst material, and solution resistances. All these resistances constitute the series resistance ( $R_s$ ) of the measurement. The  $R_s$  can be obtained from an EIS Nyquist plot as the first intercept of the main arc (corresponding to the electrode-electrolyte interface) with the real axis. For all measurements, the values of  $R_s$  are low and consistent. Then the IR-corrected data is given by  $E_{Corrected} = E_{Raw} - IR_s$ .

### I.3 Electrochemical active surface area (ECSA)

The active surface area of each catalyst was estimated from their electrochemical capacitances, which can be measured using a simple cyclic voltammetry method. We measured the currents in a narrow potential window that no faradic processes were observed, thus the currents should be mostly, if not only, due to the charging of the double layer, which is expected to be linearly proportional to the active surface area. By plotting the capacitive currents ( $\Delta J$ ,  $J_{\text{anodic}} - J_{\text{cathodic}}$ ) against the scanning rate and following with a linear fit, the double layer capacitance ( $C_{\text{dl}}$ ) can be estimated as half of the slope (see Fig.S1 for an example of NF-Ni<sub>3</sub>S<sub>2</sub>/NF). The  $C_{\text{dl}}$  can be further converted into ECSA using the specific capacitance value for a standard with 1 cm<sup>2</sup> of real surface area. The specific capacitance for a flat surface is normally between 0.02-0.06 mF cm<sup>-2</sup>. Note Ni foam was used as the support its capacitance value is much larger than that of a flat surface. Therefore, here Ni foam was considered as the standard. The ECSA of each catalyst can be calculated according to:

$$A_{\text{ECSA}} = \frac{C_{\text{dl-catalyst}} (\text{mF cm}^{-2})}{C_{\text{dl-Ni foam}} (\text{mF cm}^{-2}) \text{ per ECSA cm}^{-2}}$$

Taking NF-Ni<sub>3</sub>S<sub>2</sub>/NF as an example, upon the hydrogen evolution reaction, the ECSA of NF-Ni<sub>3</sub>S<sub>2</sub>/NF can be calculated as:

$$A_{\text{ECSA}}^{\text{NF-Ni}_3\text{S}_2/\text{NF}} = \frac{99.2 \text{ mF cm}^{-2}}{3.8 \text{ mF cm}^{-2} \text{ per ECSA cm}^{-2}} = 26.1 \text{ cm}^2_{\text{ECSA}}$$

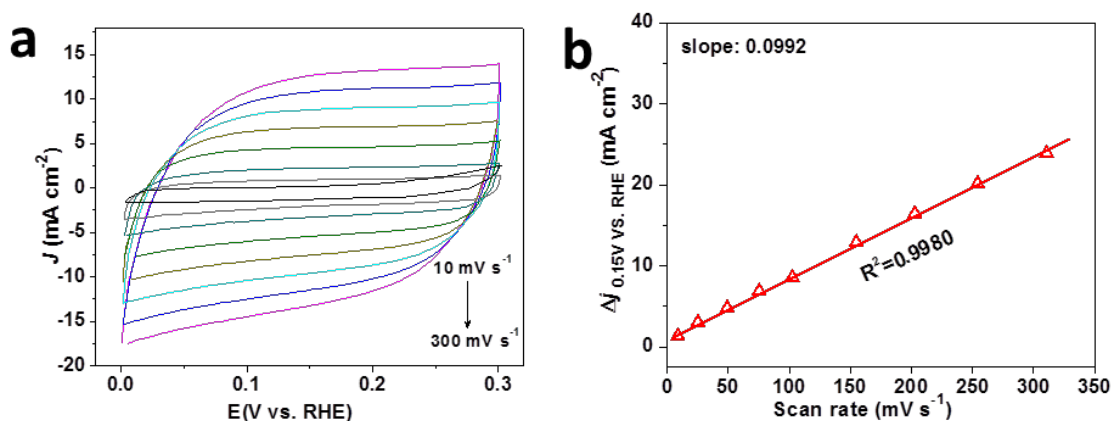

**Figure S1.** Electrochemical capacitance measurements for the estimation of the relative elec-

trochemical active surface area of NF-Ni<sub>3</sub>S<sub>2</sub>/NF upon HER. (a) Cyclic voltammograms in the region of 0-0.3 V vs RHE. (b) The differences in current density at 0.150 V vs RHE plotted as a function of scan rate fitted to a linear regression, where the slope is twice C<sub>dl</sub>.

#### I.4 Determination of Faradaic efficiency

The Faradic efficiency of a catalyst in HER or OER is defined as the ratio of the amount of H<sub>2</sub> or O<sub>2</sub>, respectively, evolved during the experiments to the amount of H<sub>2</sub> or O<sub>2</sub> expected based on theoretical considerations. So, to measure the Faradic efficiency of, for example, HER we carried out the following experiment. We collected the evolved H<sub>2</sub> gas by water drainage method, and then calculated the moles of H<sub>2</sub> generated from the reaction with an ideal gas law. The purity of the generated gas was confirmed by gas chromatography (GC) analysis. As for the theoretical value, we assumed that 100% current efficiency occurs during the reaction, which means only the HER process takes place at the working electrode. We can then calculate the theoretical amount of H<sub>2</sub> evolved by applying the Faraday law, which states that the passage of 96485.4 C charge causes 1 equivalent of reaction.

#### I.5 Turnover frequency (TOF) calculations

Cyclic voltammetry (CV) curves were measured at 0.05 V s<sup>-1</sup> in phosphate buffered saline solution (PBS, pH = 7.0). Then the absolute components of the voltammetric charges (ca-thodic and anodic) reported during a single measurement was added. The quantity of active species (*N*) is calculated according to the formula:

$$N = \frac{Q}{2F} = \frac{i \cdot t}{2F} = \frac{i \cdot V/u}{2F}$$

where *Q* is the cyclic voltammetric charge capacity obtained by integrating the CV curves, *F* is the Faradic constant (96485 C mol<sup>-1</sup>), *i* is the current density (A), *V* is the voltage (v) and *u* is the scanning rate (V s<sup>-1</sup>).

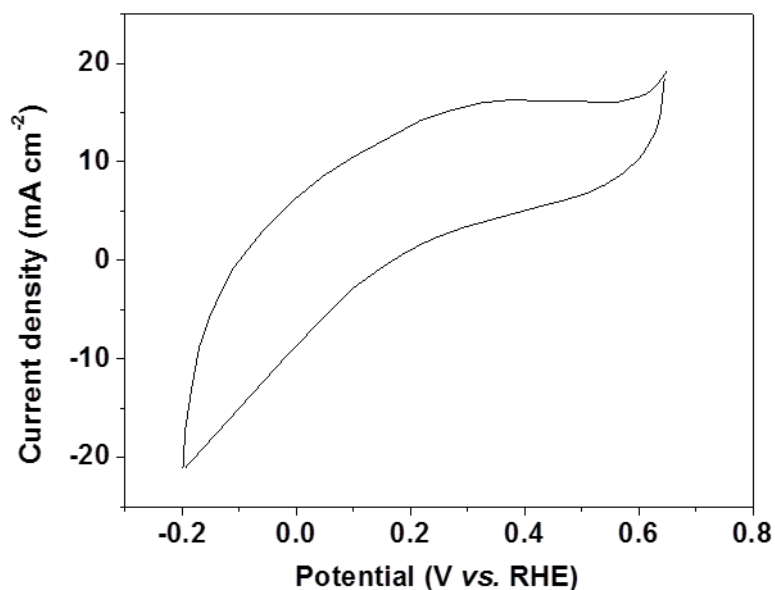

**Figure S2.** CV curve of NF-Ni<sub>3</sub>S<sub>2</sub>/Ni foam in PBS solution (pH = 7.0) at a scan rate of 50 mV s<sup>-1</sup>

The TOF values are calculated via the following equation:

$$TOF = \frac{|j|A}{mFN}$$

where  $|j|$  is the current density at a fixed voltage during the LSV measurement in 1.0 M solu-

tion,  $A$  stands for the area of the electrode (0.5 cm<sup>2</sup>) and  $F$  is the Faradic constant (96485 C mol<sup>-1</sup>).  $N$  represents the quantity of active sites. A factor of  $1/m$  is introduced, taking into account that  $m$  electrons are consumed to form one H<sub>2</sub> or O<sub>2</sub> molecule from water (i.e. 2 electrons for hydrogen evolution reaction and 4 electrons for oxygen evolution reaction).

## II. Additional Data and Figures

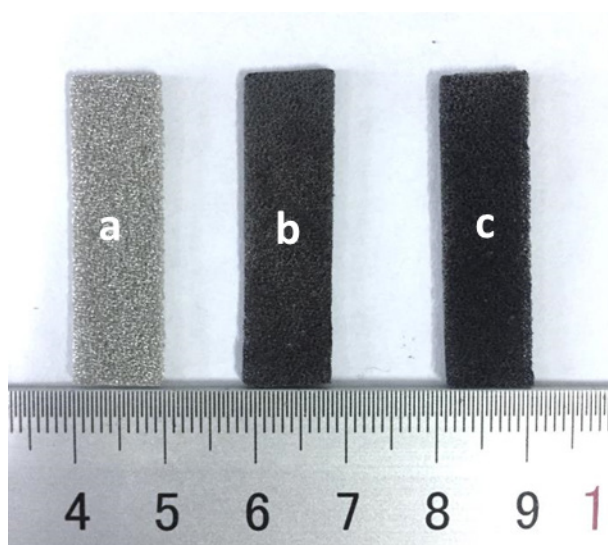

**Figure S3.** The digital images of (a) pure NF, (b) RA-Ni<sub>3</sub>S<sub>2</sub>/NF, (c) NF-Ni<sub>3</sub>S<sub>2</sub>/NF

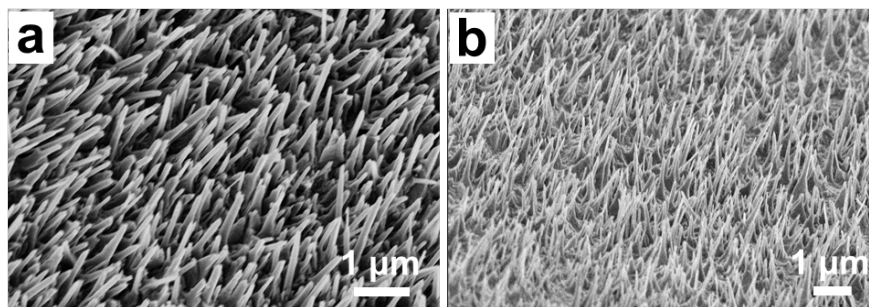

**Figure S4.** Additional SEM images of RA-Ni<sub>3</sub>S<sub>2</sub>/NF

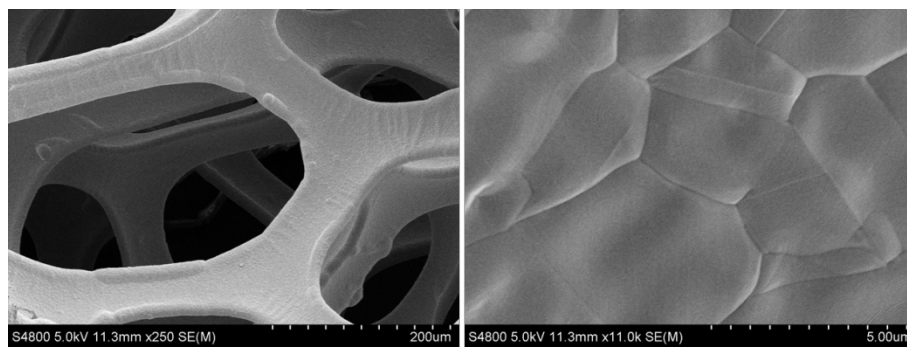

**Figure S5.** SEM images of bare Ni foam. The SEM image reveals the smooth surface of bare Ni foam.

## Formation mechanism analysis of Ni<sub>3</sub>S<sub>2</sub> nanoforests

To clarify the formation mechanism of Ni<sub>3</sub>S<sub>2</sub> nanoforest supported on Ni foam, SEM, and XRD are used to characterize the intermediates collected at different reaction stages (Figures S6-9). After the reaction of Ni foam with thiourea and EDA for 10 min, the color of the Ni foam rapidly changes from silver gray to gray black, suggesting the possible reaction of Ni with S ions in solution. SEM (Figure S6b) reveals that the spherical nanoparticles are produced. In addition to the peaks of Ni, weak peaks attributed to the rhombohedral phase of NiS (JCPDS 77-1624) can be observed in XRD pattern (Figure S7). When the reaction proceed for 30 min, some nanoparticles on Ni foam become short nanorods on substrate (Figure S6c). Along with further reaction for 1 h 30 min, nanowires with branching structures are found (Figure S6d), and the associated XRD pattern (Figure S7) confirm the existence of rhombohedral NiS and hexagonal Ni<sub>3</sub>S<sub>2</sub>, suggesting the growth of small rhombohedral NiS branches on hexagonal Ni<sub>3</sub>S<sub>2</sub> trunks may proceed via phase-transition induced branching mechanism, similar to that of CdTe tetrapods with wurtzite-phase branches and tetrahedral zinc-blende core.<sup>8</sup> When the reaction time is increased to 3 h, the XRD signals of rhombohedral NiS disappear, suggesting the totally transformation from rhombohedral NiS to hexagonal Ni<sub>3</sub>S<sub>2</sub>. Such phase transformation is previously reported and explained by Li group.<sup>9</sup> This process can be due to that the continuous supply of Ni ions, released from Ni substrate by the induced role of EDA,<sup>10</sup> provide nickel source for the growth of trees. Defects on the surfaces of both the trunks and branches can provide nucleation sites for the growth of both the trunks and branches.<sup>11</sup> The disappearance of some small nanowires and sampling can be attributed to Ostwald ripening process.<sup>12</sup>

Based on these above-mentioned results and discussion, we propose the possible growth mechanism of Ni<sub>3</sub>S<sub>2</sub> nanoforest/Ni foam (Figure S9). The mechanism seems to the amine-assisted self-catalyzed NiS nanowire growth, the following phase-induced branching of Ni<sub>3</sub>S<sub>2</sub> on NiS nanowires, accompanying phase-transfer reaction from rhombohedral NiS to hexagonal Ni<sub>3</sub>S<sub>2</sub>, the sequential self-catalyzed growth of hierarchical branches and the final formation of treelike architectures. Ostwald ripening process may accompany the growth



process.

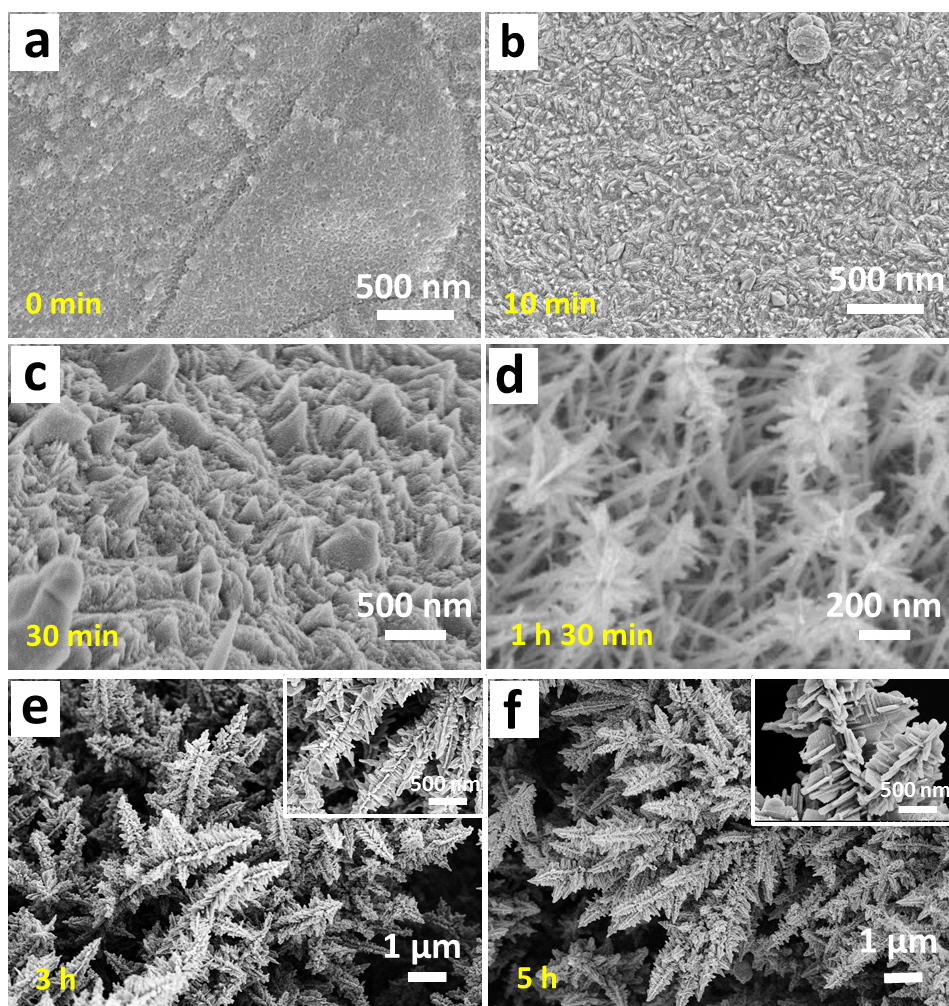

**Figure S6.** SEM images of the intermediates collected after the reaction proceeded for different reaction time.

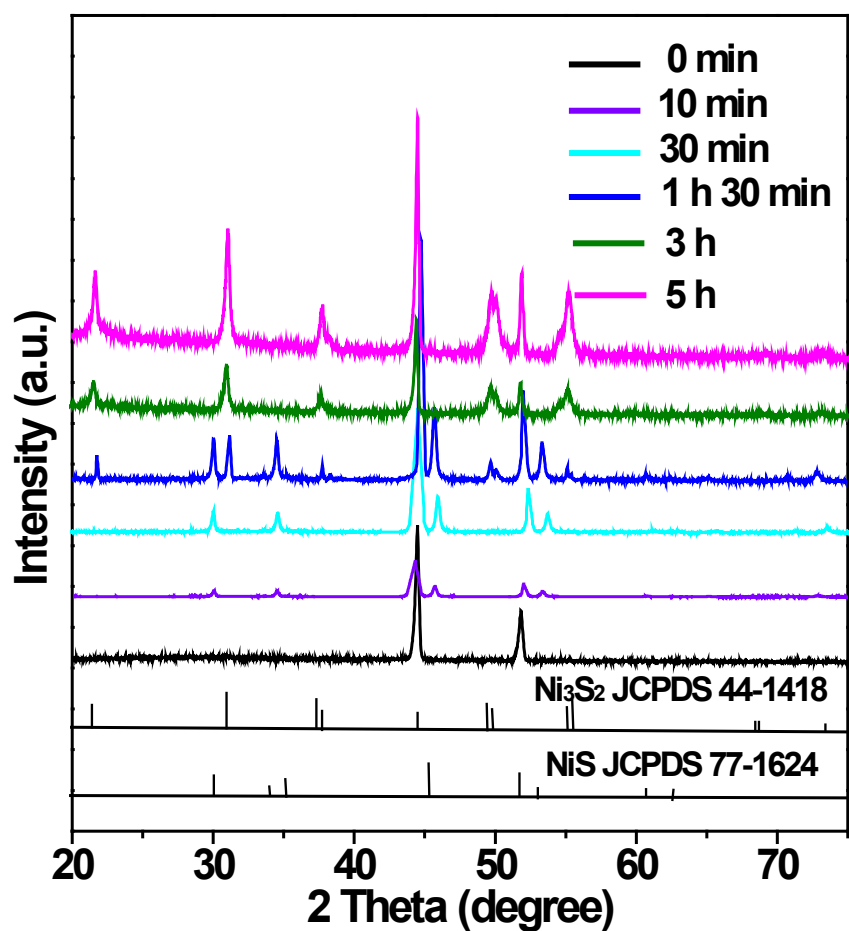

**Figure S7.** XRD patterns of the intermediates collected after the reaction proceeded for different time.

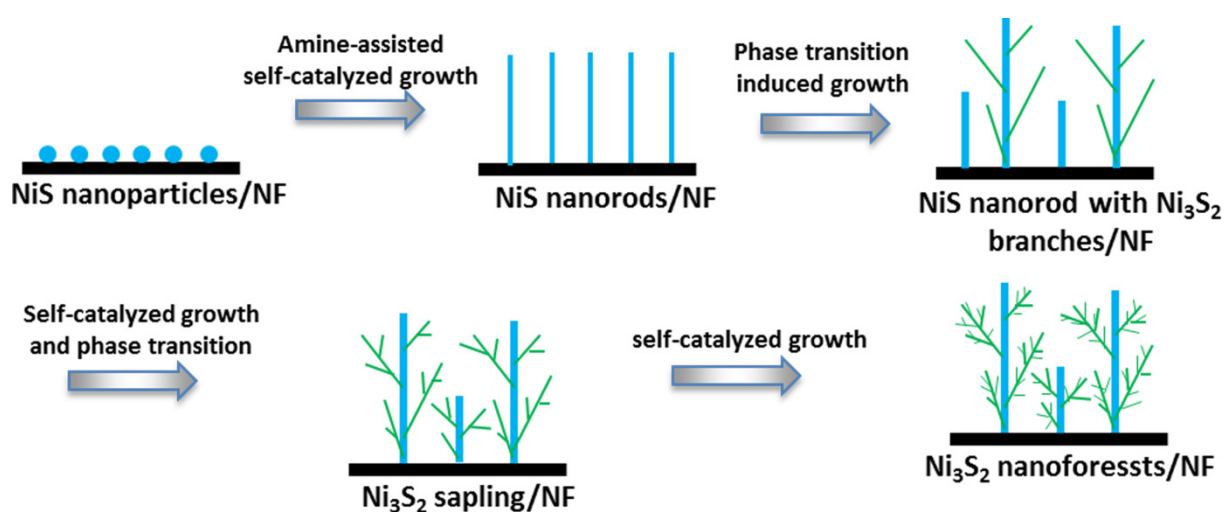

**Figure S8.** Scheme illustrating for the formation process of Ni<sub>3</sub>S<sub>2</sub> nanoforests on Ni foam

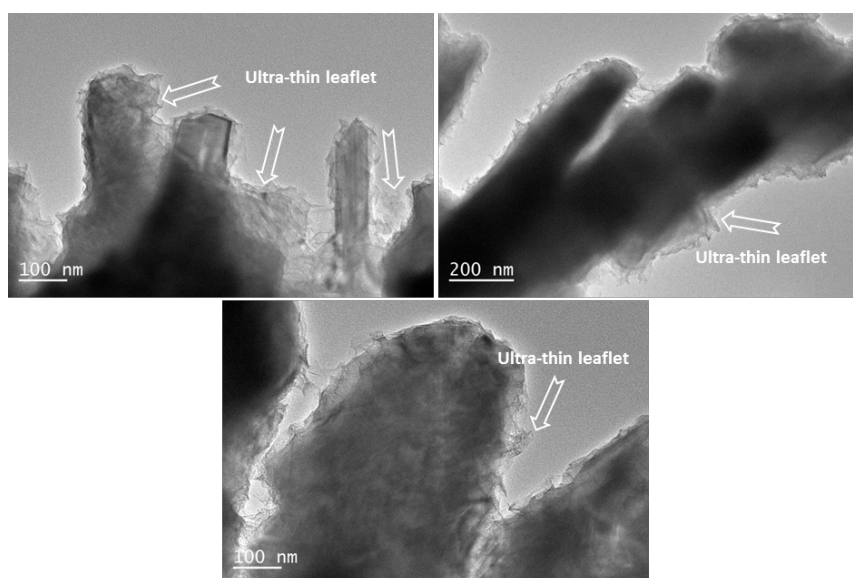

**Figure S9.** Additional TEM images of NF-Ni<sub>3</sub>S<sub>2</sub>/NF. In the TEM images, the branched structure is enveloped in a thin layer of ultrathin nanosheets, which possibly deliver unexpectedly excellent electrochemical catalytic performance due to the abundant electroactive sites.

### Brunauer-Emmett-Teller (BET) analysis

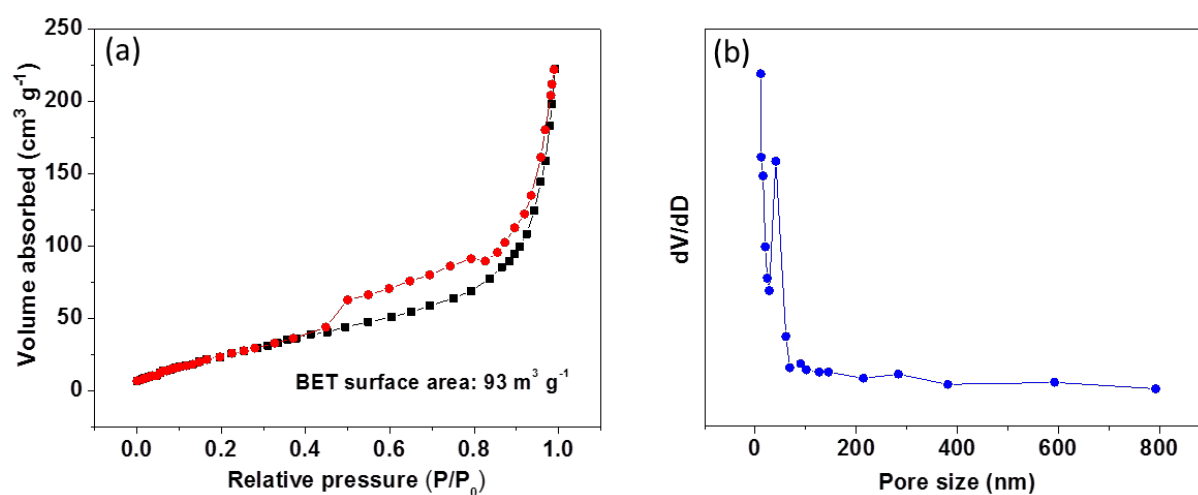

**Figure S10.** (a) N<sub>2</sub> adsorption isotherm and (b) the corresponding pore size distribution of NF-Ni<sub>3</sub>S<sub>2</sub>/NF

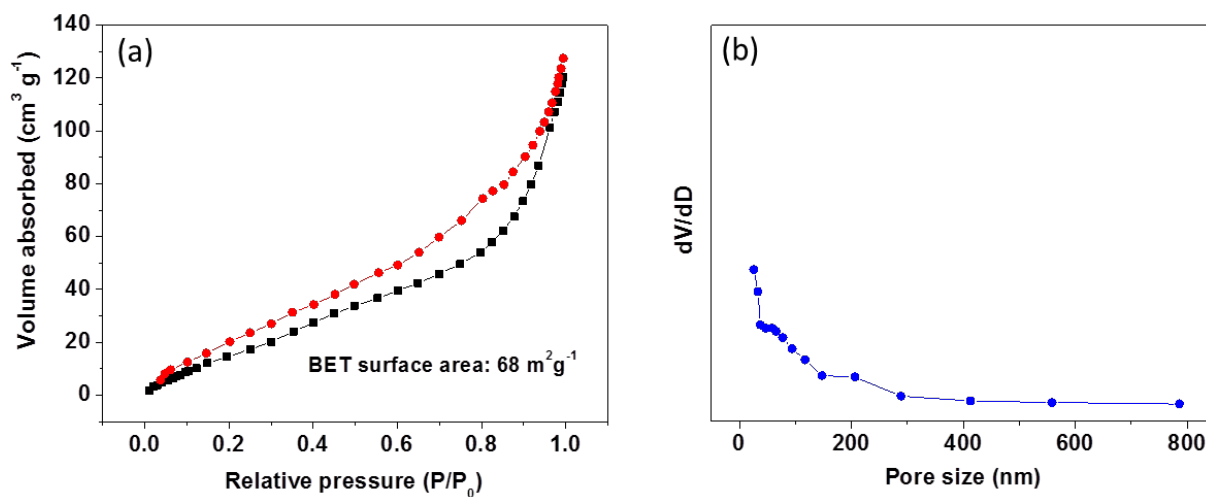

**Figure S11.** (a)  $N_2$  adsorption isotherm and (b) the corresponding pore size distribution of RA- $\text{Ni}_3\text{S}_2/\text{NF}$

### Cyclic voltammograms

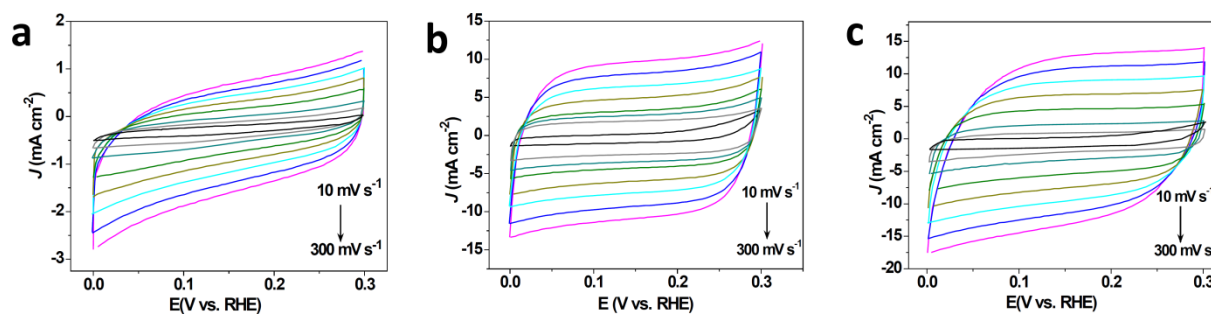

**Figure S12.** Cyclic voltammograms of (a) Ni foam, (b) RA- $\text{Ni}_3\text{S}_2/\text{NF}$ , and (c) NF- $\text{Ni}_3\text{S}_2/\text{NF}$  catalysts in the region of 0-0.3 V vs RHE.

### Polarization curves normalized to their ECSA

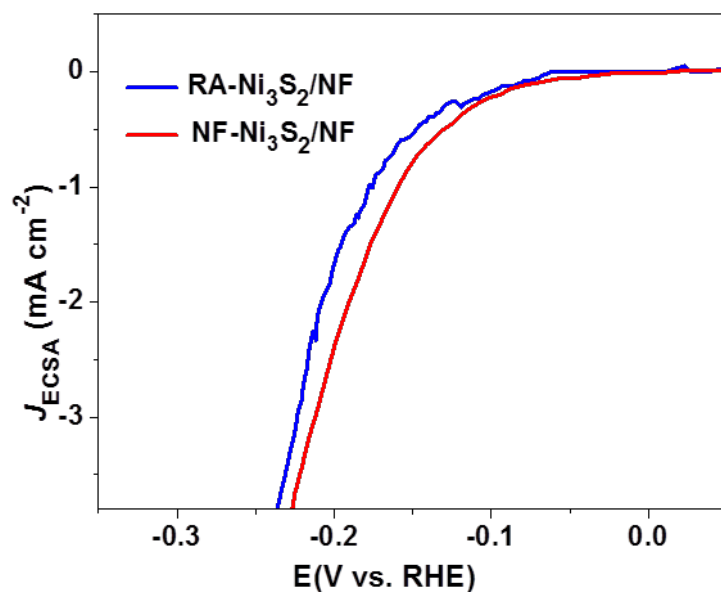

**Figure S13.** Polarization curves normalized to the electrochemical active surface area (ECSA) of RA-Ni<sub>3</sub>S<sub>2</sub>/NF, and NF-Ni<sub>3</sub>S<sub>2</sub>/NF catalysts in 1.0 M KOH.

### Turnover frequency (TOF) values for HER and OER

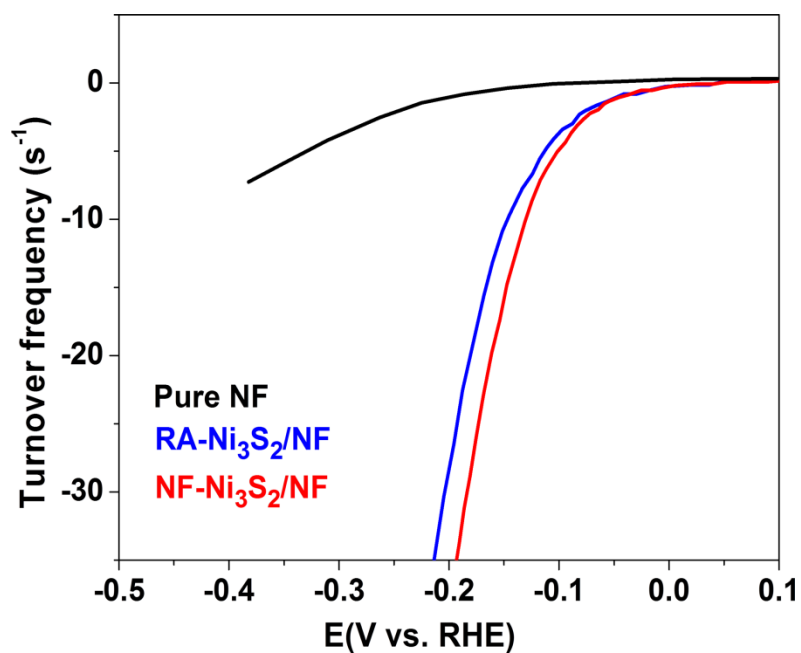

**Figure S14.** Calculated TOF of pure NF, RA-Ni<sub>3</sub>S<sub>2</sub>/NF, and NF-Ni<sub>3</sub>S<sub>2</sub>/NF catalysts for

HER in 1.0 M KOH solution

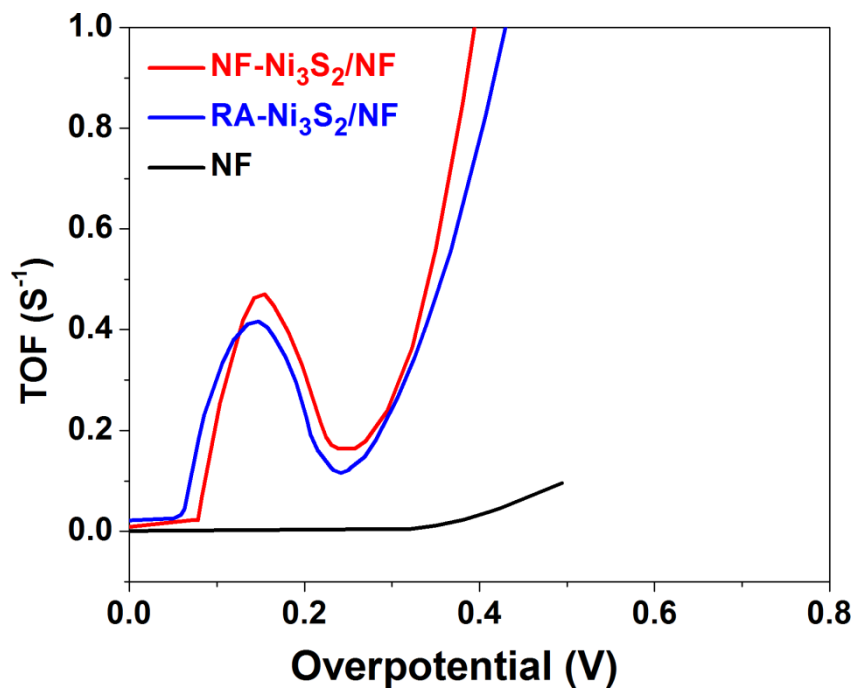

**Figure S15.** Calculated TOF of pure NF, RA-Ni<sub>3</sub>S<sub>2</sub>/NF, and NF-Ni<sub>3</sub>S<sub>2</sub>/NF catalysts for OER in 1.0 M KOH solution

### Electrochemical impedance spectroscopy (EIS) for HER

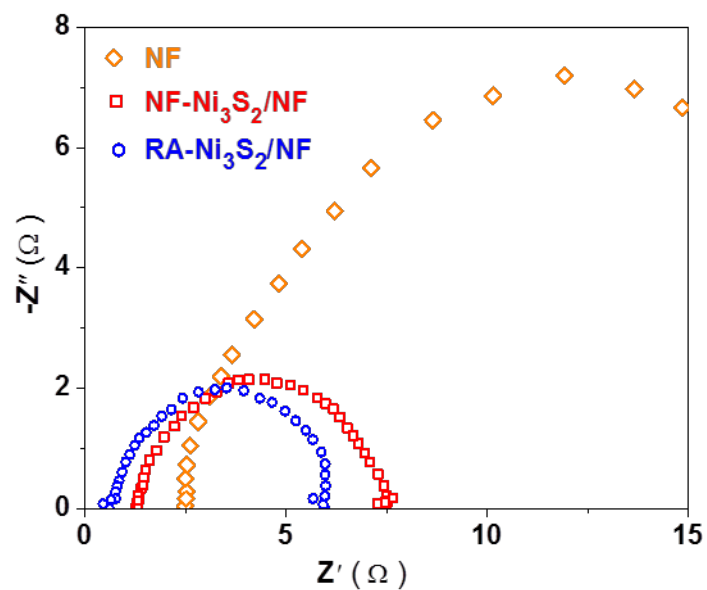

**Figure S16.** Nyquist plots of Pure NF, RA-Ni<sub>3</sub>S<sub>2</sub>/NF, and NF-Ni<sub>3</sub>S<sub>2</sub>/NF catalysts for HER in 1.0 M KOH.

### Polarization curves normalized to their BET surface areas

Brunauer-Emmett-Teller (BET) analysis shows that the BET surface areas of Ni<sub>3</sub>S<sub>2</sub> rodlike arrays and Ni<sub>3</sub>S<sub>2</sub> nanoforests are 93 m<sup>2</sup>/g and 68 m<sup>2</sup>/g, respectively. We further display the polarization curves for HER and OER normalized to their BET surface areas. As shown in Figure S11 and S12, NF-Ni<sub>3</sub>S<sub>2</sub>/NF owns enhanced BET HER and OER activity over RA-Ni<sub>3</sub>S<sub>2</sub>/NF.

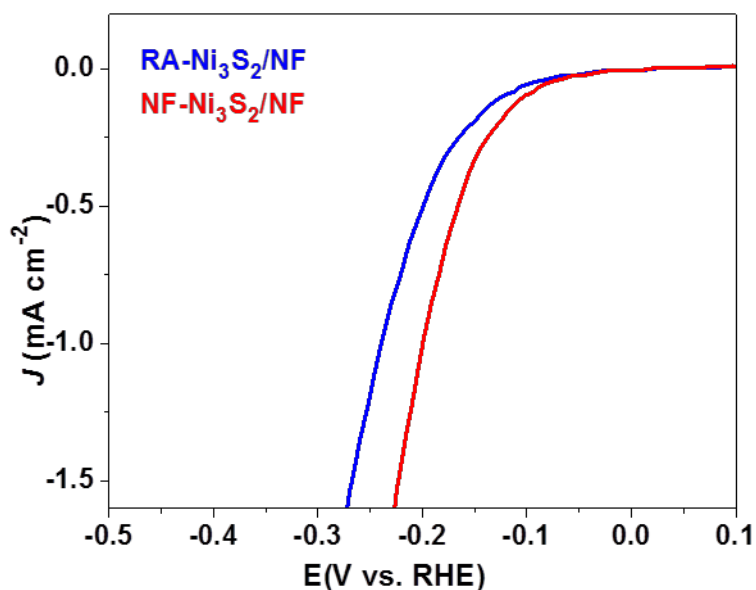

**Figure S17.** Polarization curves for HER of NF-Ni<sub>3</sub>S<sub>2</sub>/NF and RA-Ni<sub>3</sub>S<sub>2</sub>/NF normalized to their BET surface areas.

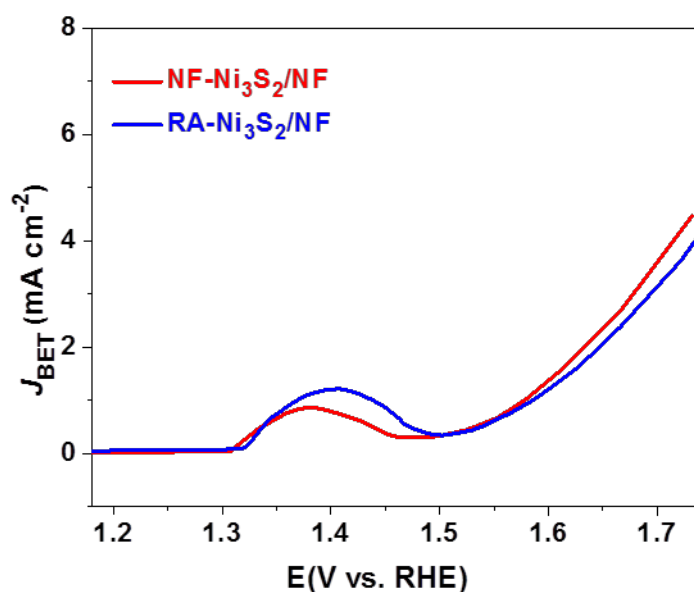

**Figure S18.** Polarization curves for OER of NF-Ni<sub>3</sub>S<sub>2</sub>/NF and RA-Ni<sub>3</sub>S<sub>2</sub>/NF normalized to their BET surface areas.

### Characterization of catalysts after 50 h overall water splitting test

SEM images and XRD pattern (Figure S13) clearly suggest that the morphology can be remained, and the peaks of  $\text{Ni}_3\text{S}_2$  (JCPDS 44-1418) are still clearly seen in the XRD pattern, suggesting the stability of  $\text{NF-Ni}_3\text{S}_2/\text{NF}$  and  $\text{RA-Ni}_3\text{S}_2/\text{NF}$  during the long-term overall water splitting measurement.

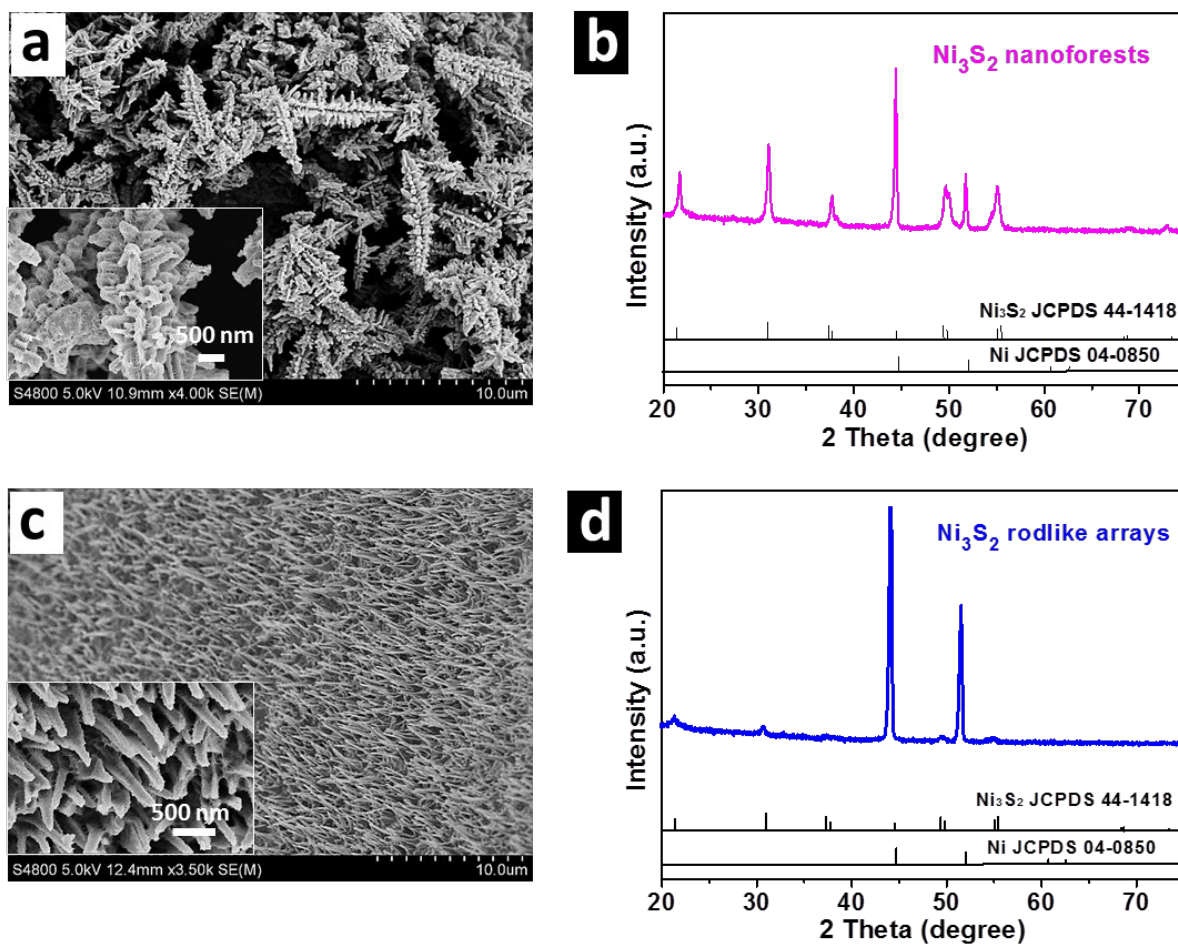

**Figure S19.** SEM image (a,c), XRD pattern (b,d) of  $\text{RA-Ni}_3\text{S}_2/\text{NF}$  (c,d) and  $\text{NF-Ni}_3\text{S}_2/\text{NF}$  (a,b) collected after 50 h long-term overall water splitting chronoamperometric test.



**Table S1.** Comparison of the OER performance of NF-Ni<sub>3</sub>S<sub>2</sub>/NF and RA-Ni<sub>3</sub>S<sub>2</sub>/NF with other reported OER electrocatalysts in basic electrolyte.

| Catalysts                                                             | $\eta_{10}$ (mV) | $\eta_{\text{onset}}$ (mV) | Tafel Slope (mV dec <sup>-1</sup> ) | Electrolyte | Ref.             |
|-----------------------------------------------------------------------|------------------|----------------------------|-------------------------------------|-------------|------------------|
| NF-Ni <sub>3</sub> S <sub>2</sub> /NF                                 | 220              | 195                        | 59                                  | 1.0 M KOH   | <i>This work</i> |
| RA-Ni <sub>3</sub> S <sub>2</sub> /NF                                 | 260              | 215                        | 64                                  | 1.0 M KOH   | <i>This work</i> |
| Ni <sub>3</sub> S <sub>2</sub> /Ni foam                               | 260              | -                          | -                                   | 1.0 M KOH   | 13               |
| carbon sheets @Ni-Mn                                                  | 270              | 250                        | 70                                  | 1.0 M KOH   | 14               |
| (Ni, Co) <sub>0.85</sub> Se@NiCo-LDH                                  | 216              | -                          | 77                                  | 1.0 M KOH   | 15               |
| NiO <sub>x</sub> /NiOOH                                               | 320              | 240                        | 58                                  | 1.0 M NaOH  | 16               |
| CoNi-LDH/Fe-porphyrinlayer-by-layer                                   | 264              | 230                        | 37.6                                | 1.0 M KOH   | 17               |
| nickel-iron oxide/C                                                   | 310              | -                          | 42                                  | 1.0 M KOH   | 18               |
| FeOOH/CeO <sub>2</sub> HLNTs-NF                                       | -230             | 210                        | 92                                  | 1.0 M NaOH  | 19               |
| Ni <sub>0.75</sub> V <sub>0.25</sub> -LDH                             | 350              | 250                        | 50                                  | 1.0 M KOH   | 20               |
| Ni <sub>x</sub> Co <sub>2x</sub> (OH) <sub>6x</sub> @Ni               | 305              | 250                        | 50                                  | 1.0 M KOH   | 21               |
| Ni <sub>45</sub> Fe <sub>55</sub> oxyhydroxide                        | 310              | -                          | 65                                  | 1.0 M KOH   | 22               |
| FeNi-rGO LDH                                                          | 206              | 195                        | 39                                  | 1.0 M KOH   | 23               |
| NiFe LDHs                                                             | 305              | -                          | 40                                  | 1.0 M KOH   | 14               |
| Ni <sub>x</sub> Co <sub>3-x</sub> O <sub>4</sub>                      | ~620             | -                          | 66                                  | 1.0 M KOH   | 24               |
| MoO <sub>2</sub> -CoO-Carbon                                          | 270              | 240                        | 37                                  | 1.0 M KOH   | 25               |
| Na <sub>0.08</sub> Ni <sub>0.9</sub> Fe <sub>0.1</sub> O <sub>2</sub> | 260              | -                          | 69                                  | 1.0 M KOH   | 17               |
| 3D-Co/cobaltphytate nanoplates                                        | 265              | -                          | 69                                  | 1.0 M KOH   | 18               |
| CoCr LDH nanosheets                                                   | 340              | 240                        | 81                                  | 1.0 M NaOH  | 26               |
| Mn-Co                                                                 | 320              | -                          | 52                                  | 1.0 M KOH   | 27               |
| NiCoP/C                                                               | 330              | -                          | 96                                  | 1.0 M KOH   | 28               |

**Table S2.** Comparison of overall water splitting performance of NF-Ni<sub>3</sub>S<sub>2</sub>/NF and RA-Ni<sub>3</sub>S<sub>2</sub>/NF with recently reported bi-functional electrocatalysts in basic electrolyte.

| Catalysts                                                                                   | HER<br>$\eta_{10}$ (mV)                        | OER<br>$\eta_{10}$ (mV)                         | Overall water<br>splitting<br>voltage for 10<br>mA cm <sup>-2</sup> (V) | Electrolyte | Ref.             |
|---------------------------------------------------------------------------------------------|------------------------------------------------|-------------------------------------------------|-------------------------------------------------------------------------|-------------|------------------|
| NF-Ni <sub>3</sub> S <sub>2</sub> /NF                                                       | 135                                            | 220                                             | 1.59                                                                    | 1.0 M KOH   | <i>This work</i> |
| RA-Ni <sub>3</sub> S <sub>2</sub> /NF                                                       | 146                                            | 260                                             | 1.62                                                                    | 1.0 M KOH   | <i>This work</i> |
| NiFe nanosheets/NiCo <sub>2</sub> O <sub>4</sub><br>nanoflakes/NF                           | 105                                            | 250                                             | 1.67                                                                    | 1.0 M KOH   | 29               |
| EG/Co <sub>0.85</sub> Se/NiFe-LDH                                                           | 260                                            | $\frac{270 \text{ mV}}{150 \text{ mA cm}^{-2}}$ | 1.67                                                                    | 1.0 M KOH   | 30               |
| $\beta$ -Ni(OH) <sub>2</sub> -OER and NiSe <sub>2</sub><br>carbon fiber paper (CP)<br>@Ni-P | 184                                            | 415                                             | ~1.78                                                                   | 1.0 M KOH   | 31               |
| Ni <sub>2.5</sub> Co <sub>0.5</sub> Fe/NF                                                   | 117                                            | $\frac{180 \text{ mV}}{20 \text{ mA cm}^{-2}}$  | 1.63                                                                    | 1.0 M KOH   | 23               |
| Ni <sub>2.5</sub> Co <sub>0.5</sub> Fe/NF                                                   | ~150                                           | 275                                             | 1.62                                                                    | 1.0 M KOH   | 32               |
| Ni <sub>x</sub> Co <sub>3-x</sub> O <sub>4</sub> /NiCo/NiCoO <sub>x</sub>                   | 155                                            | 337                                             | 1.75                                                                    | 1.0 M KOH   | 33               |
| Ni <sub>3</sub> Se <sub>2</sub> nanoforest/Ni foam                                          | 203                                            | $\frac{353 \text{ mV}}{100 \text{ mA cm}^{-2}}$ | 1.612                                                                   | 1.0 M KOH   | 34               |
| Ni <sub>x</sub> P <sub>y</sub> -325                                                         | $\frac{160 \text{ mV}}{20 \text{ mA cm}^{-2}}$ | 320                                             | 1.57                                                                    | 1.0 M KOH   | 35               |
| Ni-P foam                                                                                   | 135                                            | 145                                             | 1.64                                                                    | 1.0 M KOH   | 36               |
| V/NF                                                                                        | 176                                            | 292                                             | 1.74                                                                    | 1.0 M KOH   | 37               |
| Bi <sub>2</sub> Te <sub>3</sub> @CoNiMo on Ni foam                                          | -                                              | 80                                              | 1.41                                                                    | 0.9 M KOH   | 35               |

## Calculation of Faradaic efficiency

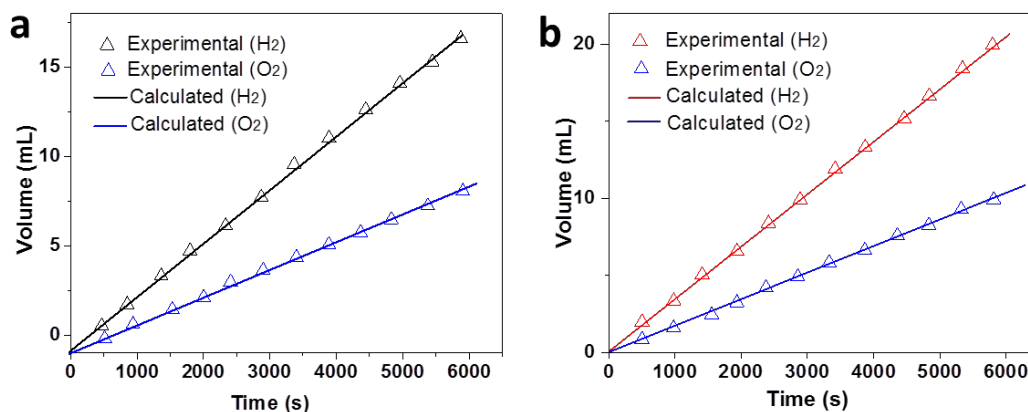

**Figure S20.** The amount of gas theoretically calculated and experimentally measured versus time of overall water splitting on (a) RA-Ni<sub>3</sub>S<sub>2</sub>/NF and (b) NF-Ni<sub>3</sub>S<sub>2</sub>/NF.

## References

- 1 Y. Wu, D. Wang, Z. Niu, P. Chen, G. Zhou and Y. Li, *Angew. Chem. Int. Ed.*, 2012, **51**, 12524-12528.
- 2 L. Wang and Y. Yamauchi, *J. Am. Chem. Soc.*, 2013, **135**, 16762-16765.
- 3 B. Qian and Z. Shen, *Langmuir*, 2005, **21**, 9007-9009.
- 4 H. D. Yu, Z. Zhang and M. Y. Han, *Small*, 2012, **8**, 2621-2635.
- 5 L. Shi, Y. Xu and Q. Li, *Cryst. Growth Des.*, 2008, **8**, 3521-3525.
- 6 Z. Zhang, Y. Wang, Z. Qi, W. Zhang, J. Qin and J. Frenzel, *The Journal of Physical Chemistry C*, 2009, **113**, 12629-12636.
- 7 Z. Zhang, X. Shao, H. Yu, Y. Wang and M. Han, *Chem. Mater.*, 2005, **17**, 332-336.
- 8 L. Manna, D. J. Milliron, A. Meisel, E. C. Scher and A. P. Alivisatos, *Nature Mater.*, 2003, **2**, 382-385.
- 9 B. Zhang, X. C. Ye, W. Dai, W. Y. Hou and Y. Xie, *Chem-Eur. J.*, 2006, **12**, 2337-2342.
- 10 Z. B. Zhuang, Q. Peng, J. Zhuang, X. Wang and Y. D. Li, *Chem-Eur. J.*, 2006, **12**, 211-217.
- 11 X. Yang, J. Zhuang, X. Li, D. Chen, G. Ouyang, Z. Mao, Y. Han, Z. He, C. Liang, M. Wu

- and J. C. Yu, *Acs Nano*, 2009, **3**, 1212-1218.
- 12 M. Saruyama, M. Kanehara and T. Teranishi, *J. Am. Chem. Soc.*, 2010, **132**, 3280-3285.
  - 13 L.-L. Feng, G. Yu, Y. Wu, G.-D. Li, H. Li, Y. Sun, T. Asefa, W. Chen and X. Zou, *J. Am. Chem. Soc.*, 2015, **137**, 14023-14026.
  - 14 F. Song and X. Hu, *Nature Commun.*, 2014, **5**, 4477-4484.
  - 15 C. Xia, Q. Jiang, C. Zhao, M. N. Hedhili and H. N. Alshareef, *Adv. Mater.*, 2016, **28**, 77-84.
  - 16 D. A. Kuznetsov, D. V. Konev, N. y. S. Komarova, A. M. Ionov, R. N. Mozhchil and I. V. Fedyanin, *Chem. Commun.*, 2016, **52**, 9255-9258.
  - 17 B. Weng, F. Xu, C. Wang, W. Meng, C. R. Grice and Y. Yan, *Energy Environ. Sci.*, 2017, **10**, 121-128.
  - 18 P. Li, Z. Jin, J. Yang, Y. Jin and D. Xiao, *Chem. Mater.*, 2016, **28**, 153-161.
  - 19 J.-X. Feng, S.-H. Ye, H. Xu, Y.-X. Tong and G.-R. Li, *Adv. Mater.*, 2016, **28**, 4698-4703.
  - 20 K. Fan, H. Chen, Y. Ji, H. Huang, P. M. Claesson, Q. Daniel, B. Philippe, H. Rensmo, F. Li, Y. Luo and L. Sun, *Nature Commun.*, 2016, **7**, 1876-1880.
  - 21 Z.-Q. Liu, G.-F. Chen, P.-L. Zhou, N. Li and Y.-Z. Su, *J. Power Sources*, 2016, **317**, 1-9.
  - 22 M. Goerlin, P. Chernev, J. F. de Araujo, T. Reier, S. Dresp, B. Paul, R. Kraehnert, H. Dau and P. Strasser, *J. Am. Chem. Soc.*, 2016, **138**, 5603-5614.
  - 23 X. Long, J. Li, S. Xiao, K. Yan, Z. Wang, H. Chen and S. Yang, *Angewandte Chemie-International Edition*, 2014, **53**, 7584-7588.
  - 24 Y. Li, P. Hasin and Y. Wu, *Adv. Mater.*, 2010, **22**, 1926-1934.
  - 25 B. B. Li, Q. Liang, X. J. Yang, Z. D. Cui, S. Z. Qiao, S. L. Zhu, Z. Y. Li and K. Yin, *Nanoscale*, 2015, **7**, 16704-16714.
  - 26 C. Dong, X. Yuan, X. Wang, X. Liu, W. Dong, R. Wang, Y. Duan and F. Huang, *J. Mater. Chem. A*, 2016, **4**, 11292-11298.
  - 27 B. Y. Guan, L. Yu and X. W. Lou, *Angewandte Chemie-International Edition*, 2017, **56**, 2386-2389.
  - 28 P. He, X.-Y. Yu and X. W. Lou, *Angewandte Chemie-International Edition*, 2017, **56**,

3897-3900.

29 C. Xiao, Y. Li, X. Lu and C. Zhao, *Adv. Funct. Mater.*, 2016, **26**, 3515-3523.

30 Y. Hou, M. R. Lohe, J. Zhang, S. Liu, X. Zhuang and X. Feng, *Energy Environ. Sci.*, 2016, **9**, 478-483.

31 K. Fan, H. Chen, Y. Ji, H. Huang, P. M. Claesson, Q. Daniel, B. Philippe, H. Rensmo, F. Li, Y. Luo and L. Sun, *Nature Commun.*, 2016, **7**, 11981-11988.

32 X. Zhu, C. Tang, H.-F. Wang, B.-Q. Li, Q. Zhang, C. Li, C. Yang and F. Wei, *J. Mater. Chem. A*, 2016, **4**, 7245-7250.

33 X. Yan, K. Li, L. Lyu, F. Song, J. He, D. Niu, L. Liu, X. Hu and X. Chen, *Acs Appl. Mater. Inter.*, 2016, **8**, 3208-3214.

34 R. Xu, R. Wu, Y. Shi, J. Zhang and B. Zhang, *Nano Energy*, 2016, **24**, 103-110.

35 K. Yin, Z. Cui, X. Zheng, X. Yang, S. Zhu, Z. Li and Y. Liang, *J. Mater. Chem. A*, 2015, **3**, 22770-22780.

36 X. Wang, W. Li, D. Xiong and L. Liu, *J. Mater. Chem. A*, 2016, **4**, 5639-5646.

37 Y. Yu, P. Li, X. Wang, W. Gao, Z. Shen, Y. Zhu, S. Yang, W. Song and K. Ding, *Nanoscale*, 2016, **8**, 10731-10738.
